# Supplementary material for: Solar-driven water evaporation using a collaborative photothermal conversion material system based on carbonized waste polyphenylene sulfide and copper sulfide
Source: Royal Society of Chemistry journal article supplement (doi:10.1039/d4nr01602e), 2024-01-01
Supplement: d4nr01602e1.pdf [file d4nr01602e1.pdf]

# Solar-driven water evaporation using a collaborative photothermal conversion material system based on carbonized waste polyphenylene sulfide and copper sulfide

Xuejing Wei <sup>a</sup>, Zixuan Zou <sup>a</sup>, Meng Liao <sup>a</sup>, Liumi Deng <sup>a</sup>, Jiayi Yao <sup>a</sup>, Li Sun <sup>a</sup>, Shaohua Chen <sup>a,\*</sup>,  
Yuhao Liu <sup>a,\*</sup>, Jiayue Chen <sup>a,\*</sup>

<sup>a</sup> College of Materials Science and Engineering, Hubei Provincial Engineering

Research Center of Industrial Fiber Preparation and Application, Wuhan Textile

University, Wuhan 430200, Hubei, China.

\* Corresponding authors.

Corresponding authors: Shaohua Chen <sup>a,\*</sup>, Yuhao Liu <sup>a,\*</sup>, Jiayue Chen <sup>a,\*</sup>

Email: shaohuachen@foxmail.com, liuyuhao951016@163.com, [cjy9480@139.com](mailto:cjy9480@139.com)

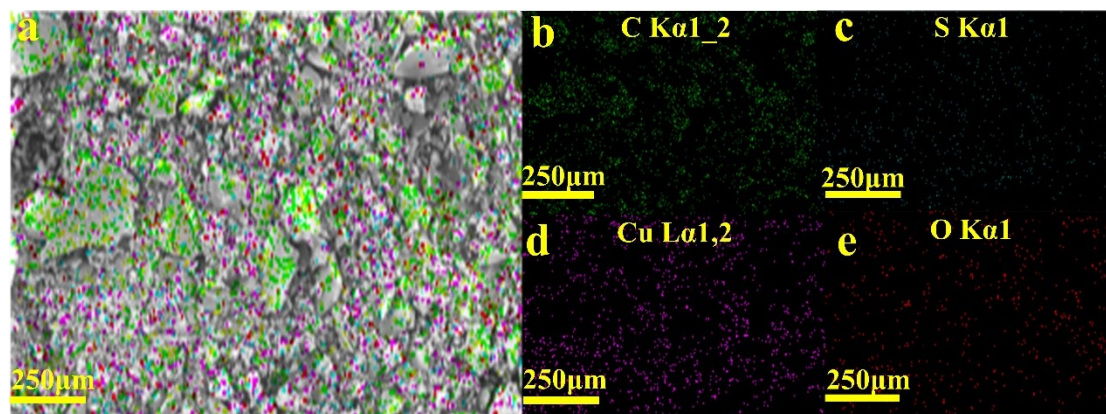

**Fig S1.** EDS image of upper surface of the CP/CUS mixture.

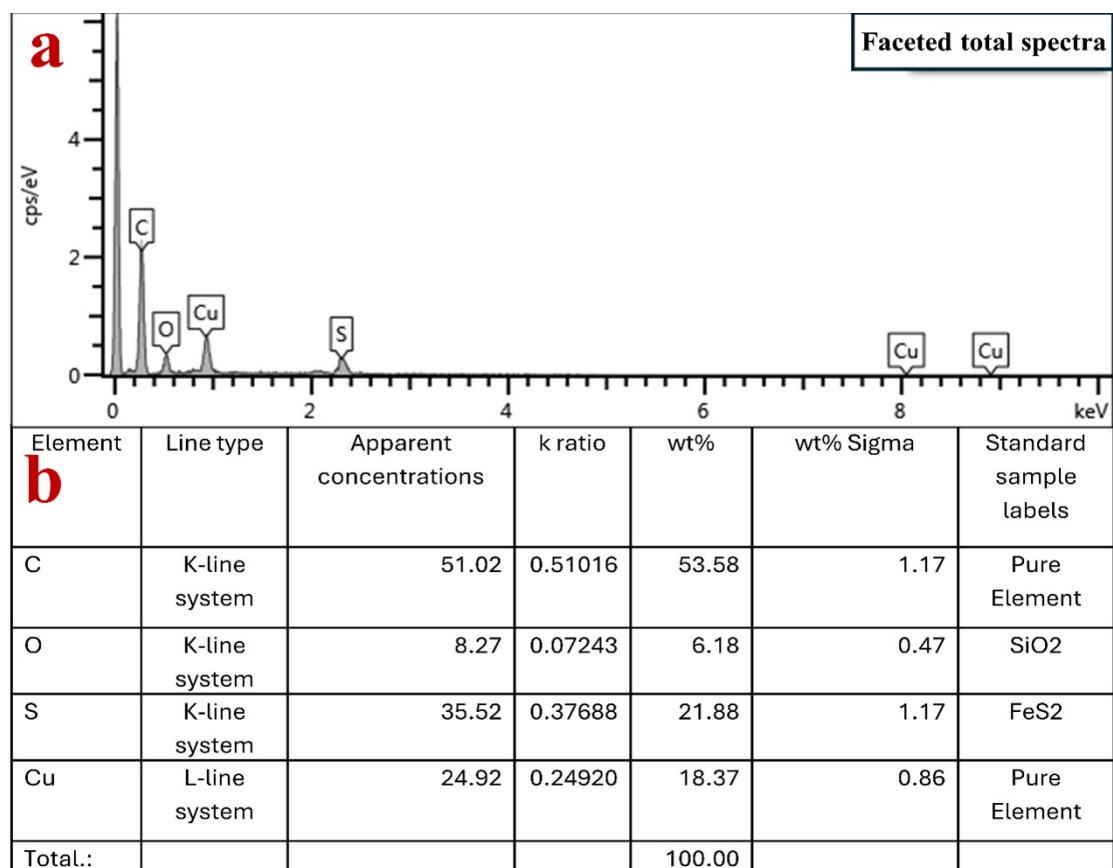

**Fig S2. Faceted total spectra of CP/CuS mixtures and distribution information of the corresponding elements.**

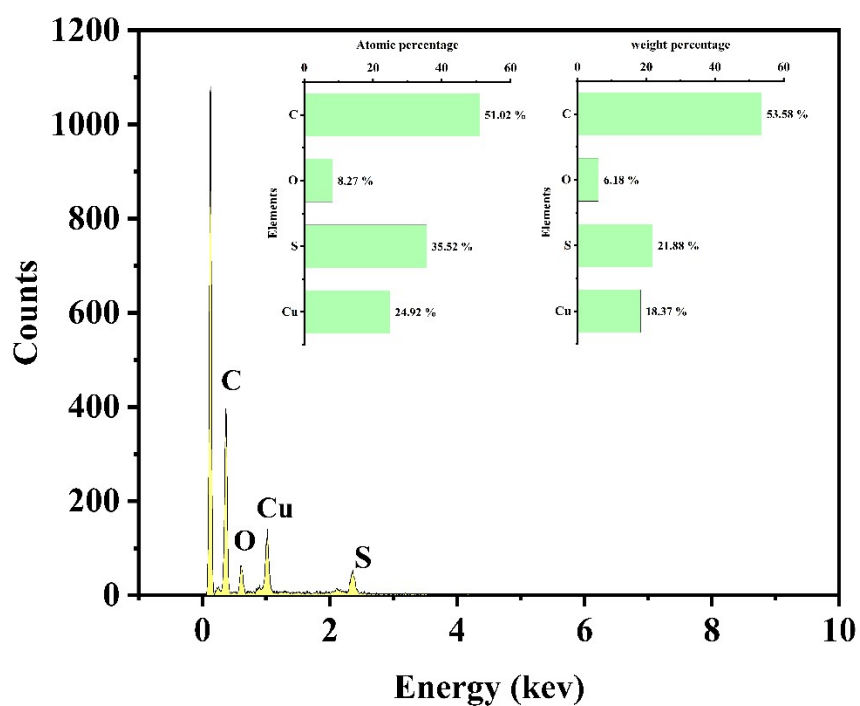

**Fig S3. Generalised map of the faceted total spectra of CP/CuS mixtures and information on the distribution of the corresponding elements.**

| Material                                 | Water Evaporation rate (kg m <sup>-2</sup> h <sup>-1</sup> ) | Efficiency at 1 sun (%) | Absorption (%) | Ref.      |
|------------------------------------------|--------------------------------------------------------------|-------------------------|----------------|-----------|
| Wood/CNTs                                | ~0.98                                                        | 65                      | ~98            | [37]      |
| Wood/Graphite                            | 1.2                                                          | 80                      | >95            | [38]      |
| Graphene oxide/MX GO film                | 1.27                                                         | 90.7                    | –              | [23]      |
| Graphene/carbon                          | 1.45                                                         | 80                      | >94            | [32]      |
| Graphene sponge /Graphene foil           | 1.558                                                        | 90                      | 97.57          | [31]      |
| Polypyrrole coated natural latex foam    | 1.69                                                         | 89.6                    | ~97.4          | [30]      |
| Cobalt-based MOF                         | 1.76                                                         | 98                      | 94.94          | [25]      |
| MnO <sub>2</sub> - modified cotton cloth | 2.2                                                          | 91.1                    | 97-98          | [47]      |
| CP/CuS-Wood                              | 2.67                                                         | 89.5                    | 85             | [35]      |
| Porous carbon polyhedron                 | 2.68                                                         | 93.2                    | 98.23          | This work |
|                                          | 2.74                                                         | 98.2                    | 99             | [40]      |

**Table S1. Comparison of the CP/CuS-Wood optical hot water evaporator with the literature**

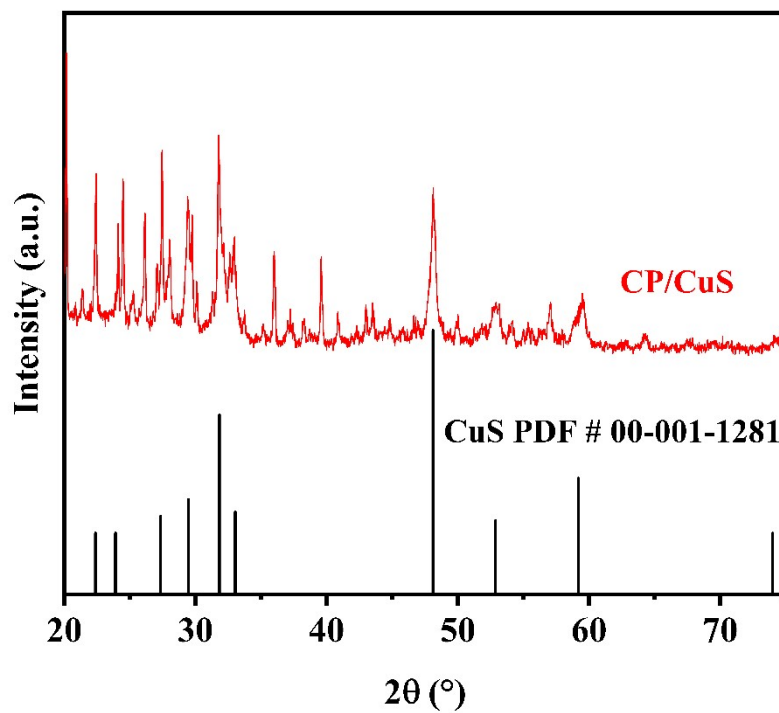

**Fig S4. XRD spectrum of photothermal material CP/CuS.**

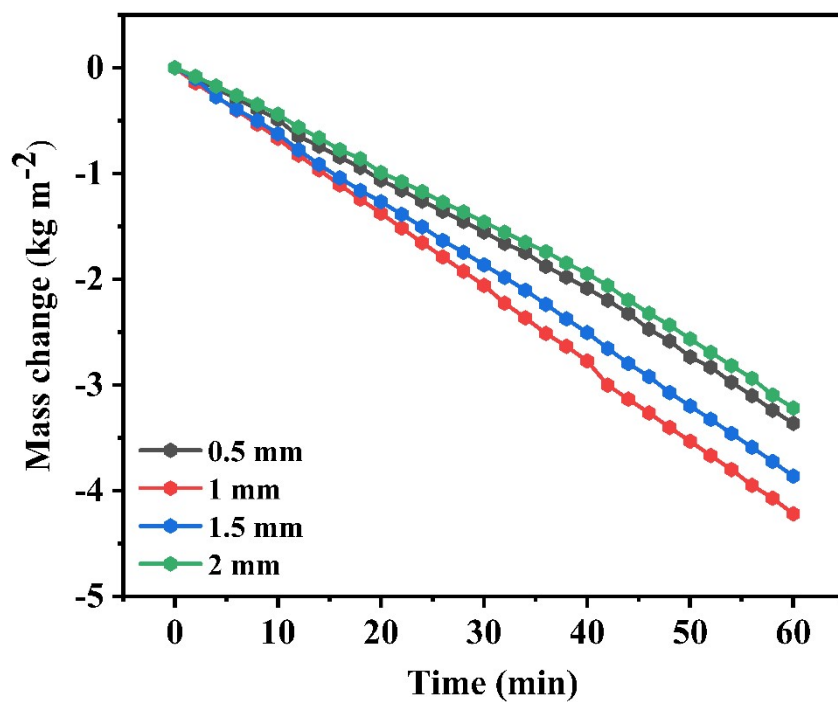

Fig S5. The mass loss in a hot water evaporator is dependent on the thickness of the CP/CuS photosensitive material.
